# Supplementary material
Source: Research Square preprint supplement (doi:10.21203/rs.3.rs-10405659/v1)
Supplement: Supplementary file 1 [file 321e5a7fd73c509b99709e72.docx]

################################################################################

# FILE: TB_KAP_Mediation_Cluster_Analysis.R

# PURPOSE: Mediation analysis and cluster analysis for TB-KAP study

# DATA: TB_KAP_data.csv (N=302)

################################################################################

# ==============================================================================

# 1. LOAD REQUIRED PACKAGES

# ==============================================================================

packages <- c("tidyverse", "ggplot2", "mediation", "lavaan",

"factoextra", "cluster", "NbClust", "corrplot",

"psych", "ggpubr", "gridExtra", "fmsb")

for (pkg in packages) {

if (!require(pkg, character.only = TRUE)) {

install.packages(pkg)

library(pkg, character.only = TRUE)

}

}

library(mediation)

# ==============================================================================

# 2. LOAD AND PREPARE DATA

# ==============================================================================

data <- read.csv("TB_KAP_data.csv", header = TRUE, stringsAsFactors = FALSE)

str(data)

summary(data)

# Create derived variables

data <- data %>%

mutate(

K_category = case_when(

K_total <= 10 ~ "Poor",

K_total >= 11 & K_total <= 15 ~ "Moderate",

K_total >= 16 ~ "Good"

),

K_category = factor(K_category, levels = c("Poor", "Moderate", "Good")),

poor_knowledge = ifelse(K_total <= 10, 1, 0),

good_knowledge_60 = ifelse(K_total >= 13, 1, 0),

good_knowledge_70 = ifelse(K_total >= 15, 1, 0),

good_knowledge_80 = ifelse(K_total >= 18, 1, 0),

positive_attitude = ifelse(A_total > 24, 1, 0),

good_practice = ifelse(P_total > 21, 1, 0),

college_factor = factor(college, levels = c(1,2), labels = c("Medical", "Non-medical")),

sex_factor = factor(sex, levels = c(1,2), labels = c("Male", "Female"))

)

# ==============================================================================

# 3. DESCRIPTIVE STATISTICS AND CORRELATION

# ==============================================================================

cat("\n========== DESCRIPTIVE STATISTICS ==========\n")

cat(paste("Total participants:", nrow(data), "\n"))

cat(paste("Mean Knowledge Score (SD):", round(mean(data$K_total), 1),

"(", round(sd(data$K_total), 2), ")\n"))

cat(paste("Mean Attitude Score (SD):", round(mean(data$A_total), 1),

"(", round(sd(data$A_total), 2), ")\n"))

cat(paste("Mean Practice Score (SD):", round(mean(data$P_total), 1),

"(", round(sd(data$P_total), 2), ")\n"))

# Correlation matrix

cat("\n========== CORRELATION MATRIX ==========\n")

cor_matrix <- cor(data[, c("K_total", "A_total", "P_total")], method = "pearson")

print(round(cor_matrix, 2))

# Correlation plot

corrplot(cor_matrix, method = "number", type = "upper",

tl.col = "black", tl.srt = 45,

col = colorRampPalette(c("#E74C3C", "white", "#2ECC71"))(200))

# ==============================================================================

# 4. MEDIATION ANALYSIS (Knowledge → Attitude → Practice)

# ==============================================================================

cat("\n========== MEDIATION ANALYSIS ==========\n")

cat("Model: Knowledge (X) → Attitude (M) → Practice (Y)\n")

# Method 1: Using 'mediation' package

med_model <- lm(A_total ~ K_total, data = data)

out_model <- lm(P_total ~ K_total + A_total, data = data)

set.seed(12345)

mediation_result <- mediate(med_model, out_model,

treat = "K_total",

mediator = "A_total",

boot = TRUE,

sims = 5000)

summary(mediation_result)

# Extract effects

total_effect <- mediation_result$tau.coef

direct_effect <- mediation_result$z0

indirect_effect <- mediation_result$d0

prop_mediated <- indirect_effect / total_effect * 100

cat("\n========== MEDIATION EFFECTS ==========\n")

cat(paste("Total effect:", round(total_effect, 3), "\n"))

cat(paste("Direct effect:", round(direct_effect, 3), "\n"))

cat(paste("Indirect effect:", round(indirect_effect, 3), "\n"))

cat(paste("Proportion mediated:", round(prop_mediated, 1), "%\n"))

# Method 2: Using 'lavaan' package

model <- '

P_total ~ c*K_total

A_total ~ a*K_total

P_total ~ b*A_total

indirect := a * b

total := c + (a * b)

'

fit <- sem(model, data = data, se = "bootstrap", bootstrap = 5000)

summary(fit, ci = TRUE, standardized = TRUE)

parameterEstimates(fit, boot.ci.type = "bca.simple")

# ==============================================================================

# 5. CLUSTER ANALYSIS (K-means)

# ==============================================================================

cat("\n========== CLUSTER ANALYSIS ==========\n")

# Select variables for clustering

cluster_vars <- data[, c("K_total", "A_total", "P_total")]

cluster_vars_scaled <- scale(cluster_vars)

# Determine optimal number of clusters using elbow method

wss <- sapply(1:10, function(k) {

kmeans(cluster_vars_scaled, centers = k, nstart = 25)$tot.withinss

})

# Elbow plot

elbow_plot <- data.frame(k = 1:10, wss = wss)

ggplot(elbow_plot, aes(x = k, y = wss)) +

geom_line(color = "#3498DB", size = 1.2) +

geom_point(color = "#E74C3C", size = 3) +

geom_vline(xintercept = 3, linetype = "dashed", color = "gray40") +

labs(title = "Elbow Method for Optimal Number of Clusters",

x = "Number of Clusters (k)",

y = "Total Within-Cluster Sum of Squares") +

theme_minimal()

# Silhouette score for k=3

sil_width <- sapply(2:10, function(k) {

km <- kmeans(cluster_vars_scaled, centers = k, nstart = 25)

ss <- silhouette(km$cluster, dist(cluster_vars_scaled))

mean(ss[, 3])

})

cat("\nSilhouette scores:\n")

for (i in 2:10) {

cat(paste("k =", i, ":", round(sil_width[i-1], 3), "\n"))

}

# Run K-means with k=3

set.seed(12345)

kmeans_result <- kmeans(cluster_vars_scaled, centers = 3, nstart = 25)

data$cluster <- kmeans_result$cluster

# Cluster summary

cluster_summary <- data %>%

group_by(cluster) %>%

summarise(

n = n(),

K_mean = mean(K_total),

K_sd = sd(K_total),

A_mean = mean(A_total),

A_sd = sd(A_total),

P_mean = mean(P_total),

P_sd = sd(P_total),

pct_medical = mean(college == 1) * 100,

pct_female = mean(sex == 2) * 100,

pct_junior = mean(year_study <= 2) * 100

)

print(cluster_summary)

# Assign cluster labels

data <- data %>%

mutate(

cluster_label = case_when(

cluster == 1 ~ "TB-aware",

cluster == 2 ~ "Moderately informed",

cluster == 3 ~ "TB-ignorant"

)

)

# ==============================================================================

# 6. RADAR CHART FOR CLUSTER PROFILES

# ==============================================================================

radar_data <- cluster_summary %>%

select(cluster, K_mean, A_mean, P_mean) %>%

mutate(

K_norm = (K_mean - min(K_mean)) / (max(K_mean) - min(K_mean)) * 100,

A_norm = (A_mean - min(A_mean)) / (max(A_mean) - min(A_mean)) * 100,

P_norm = (P_mean - min(P_mean)) / (max(P_mean) - min(P_mean)) * 100

)

radar_long <- radar_data %>%

select(cluster, K_norm, A_norm, P_norm) %>%

pivot_longer(cols = c(K_norm, A_norm, P_norm),

names_to = "Domain", values_to = "Score") %>%

mutate(Domain = recode(Domain,

"K_norm" = "Knowledge",

"A_norm" = "Attitude",

"P_norm" = "Practice"))

ggplot(radar_long, aes(x = Domain, y = Score, color = factor(cluster), group = cluster)) +

geom_line(size = 1.2) +

geom_point(size = 3) +

coord_polar() +

scale_color_manual(values = c("#2ECC71", "#F1C40F", "#E74C3C"),

labels = c("Cluster 1: TB-aware",

"Cluster 2: Moderately informed",

"Cluster 3: TB-ignorant")) +

labs(title = "Cluster Profiles: Knowledge, Attitude, and Practice",

color = "Cluster") +

theme_minimal()

# ==============================================================================

# 7. EXPORT RESULTS

# ==============================================================================

write.csv(data[, c("ID", "K_total", "A_total", "P_total", "cluster", "cluster_label")],

"Cluster_Assignments.csv", row.names = FALSE)

mediation_results_df <- data.frame(

Effect = c("Total effect", "Direct effect", "Indirect effect", "Proportion mediated"),

Estimate = c(total_effect, direct_effect, indirect_effect, prop_mediated),

CI_lower = c(NA, NA, mediation_result$d0.ci[1], NA),

CI_upper = c(NA, NA, mediation_result$d0.ci[2], NA)

)

write.csv(mediation_results_df, "Mediation_Results.csv", row.names = FALSE)

cat("\n========== ANALYSIS COMPLETE ==========\n")

cat("Output files generated:\n")

cat(" - Cluster_Assignments.csv\n")

cat(" - Mediation_Results.csv\n")

################################################################################
