# Supplementary material
Source: Research Square preprint supplement (doi:10.21203/rs.3.rs-10405659/v1)
Supplement: Supplementary file 2 [file 8df82f1c58b4f345d89bfe86.docx]

FILE S7: SUPPLEMENTARY TABLES (Complete KAP by Subgroup)

# Table S7.1: Knowledge scores by sociodemographic characteristics

| **Variable** | **Category** | **n** | **Mean Knowledge Score (SD)** | **p-value*** |
| --- | --- | --- | --- | --- |
| Overall | All | 302 | 12.1 (4.6) | – |
| Sex | Male | 122 | 10.2 (4.1) | <0.001 |
|  | Female | 180 | 13.4 (4.5) |  |
| College | Medical | 123 | 15.6 (3.8) | <0.001 |
|  | Non-medical | 179 | 9.7 (3.9) |  |
| Year | of | study | 1st-2nd 156 | 10.5 |
|  | 3rd-4th | 110 | 13.2 (4.2) |  |
|  | 5th-6th | 36 | 15.8 (3.5) |  |
| Know | someone | with | TB Yes | 48 |
|  | No | 254 | 11.8 (4.6) |  |
| Smoking | Yes | 38 | 10.5 (4.3) | 0.012 |
|  | No | 264 | 12.4 (4.6) |  |
| Residence | Urban | 266 | 12.3 (4.6) | 0.089 |
|  | Rural | 36 | 11.0 (4.4) |  |
| Marital | status | Single | 266 12.2 | (4.6) |
|  | Married | 36 | 11.6 (4.5) |  |

*Independent t-test or one-way ANOVA; **Post-hoc: all pairwise comparisons significant at p<0.05

# Table S7.2: Attitude scores by sociodemographic characteristics

| **Variable** | **Category** | **n** | **Mean Attitude Score (SD)** | **p-value** |
| --- | --- | --- | --- | --- |
| Overall | All | 302 | 28.4 (5.2) | – |
| Sex | Male | 122 | 26.8 (5.1) | <0.001 |
|  | Female | 180 | 29.5 (5.0) |  |
| College | Medical | 123 | 31.2 (4.5) | <0.001 |
|  | Non-medical | 179 | 26.5 (4.8) |  |
| Year | of | study | 1st-2nd 156 | 27.0 |
|  | 3rd-4th | 110 | 29.5 (4.9) |  |
|  | 5th-6th | 36 | 31.0 (4.2) |  |
| Know | someone | with | TB Yes | 48 |
|  | No | 254 | 28.2 (5.2) |  |
| Smoking | Yes | 38 | 26.5 (5.3) | 0.018 |
|  | No | 264 | 28.7 (5.1) |  |

# Table S7.3: Practice scores by sociodemographic characteristics

| **Variable** | **Category** | **n** | **Mean Practice Score (SD)** | **p-value** |
| --- | --- | --- | --- | --- |
| Overall | All | 302 | 18.7 (4.8) | – |
| Sex | Male | 122 | 17.2 (4.5) | <0.001 |
|  | Female | 180 | 19.7 (4.8) |  |
| College | Medical | 123 | 20.8 (4.5) | <0.001 |
|  | Non-medical | 179 | 17.3 (4.5) |  |
| Year | of | study | 1st-2nd 156 | 17.5 |
|  | 3rd-4th | 110 | 19.5 (4.6) |  |
|  | 5th-6th | 36 | 21.2 (4.2) |  |
| Know | someone | with | TB Yes | 48 |
|  | No | 254 | 18.5 (4.8) |  |
| Smoking | Yes | 38 | 17.0 (4.8) | 0.022 |
|  | No | 264 | 18.9 (4.8) |  |

# Table S7.4: Knowledge category distribution by college and sex (n, %)

| **Variable** | **Category** | **Poor Knowledge n (%)** | **Moderate Knowledge n (%)** | **Good Knowledge n (%)** | **p-value** |
| --- | --- | --- | --- | --- | --- |
| College | Medical | 12 (9.8) | 27 (21.9) | 84 (68.3) | <0.001 |
|  | Non-medical | 54 (30.2) | 71 (39.7) | 54 (30.2) |  |
| Sex | Male | 38 (31.1) | 45 (36.9) | 39 (32.0) | <0.001 |
|  | Female | 28 (15.6) | 53 (29.4) | 99 (55.0) |  |
| Year | 1st-2nd | 42 (26.9) | 60 (38.5) | 54 (34.6) | <0.001 |
|  | 3rd-4th | 18 (16.4) | 31 (28.2) | 61 (55.5) |  |
|  | 5th-6th | 6 (16.7) | 6 (16.7) | 24 (66.7) |  |

# Table S7.5: Individual knowledge item correct responses by college

| **Knowledge Item** | **Medical (n=123) % correct** | **Non-medical (n=179) % correct** | **p-value** |
| --- | --- | --- | --- |
| TB caused by bacterium | 82.1 | 51.4 | <0.001 |
| Lung is primary organ | 95.9 | 85.5 | 0.003 |
| There is a vaccine (BCG) | 76.4 | 45.8 | <0.001 |
| TB can be cured | 91.9 | 79.9 | 0.004 |
| Person exposed should be tested | 93.5 | 82.1 | 0.003 |
| Airborne transmission | 85.4 | 60.9 | <0.001 |
| Drug resistance from non-adherence | 78.0 | 53.6 | <0.001 |
| BCG not lifetime protection | 52.0 | 19.0 | <0.001 |
| TB is contagious | 93.5 | 83.8 | 0.011 |
| Cough >2 weeks is symptom | 38.2 | 12.3 | <0.001 |
| Correct treatment duration (6-9 months) | 58.5 | 27.4 | <0.001 |
| Wearing mask prevents transmission | 85.4 | 63.1 | <0.001 |
| Ventilated homes prevent transmission | 78.9 | 56.4 | <0.001 |

# Table S7.6: Practice item responses by college – Always/Usually %

| **Practice Item** | **Medical (n=123)** | **Non-medical (n=179)** | **p-value** |
| --- | --- | --- | --- |
| Cover mouth when coughing/sneezing | 69.1 | 56.4 | 0.024 |
| Open windows for fresh air | 74.8 | 64.2 | 0.048 |
| Eat balanced diet | 64.2 | 54.2 | 0.082 |
| Wash hands after hospital visit | 62.6 | 48.6 | 0.016 |
| Wear facemask at hospital | 36.6 | 22.9 | 0.008 |
| Seek care if cough >2 weeks | 31.7 | 16.8 | 0.002 |
| Read TB awareness materials | 39.8 | 26.3 | 0.011 |
