# Supplementary material
Source: Research Square preprint supplement (doi:10.21203/rs.3.rs-10405659/v1)
Supplement: Supplementary file 3 [file a8f9292cd053a07532101640.docx]

FILE S1: STUDY QUESTIONNAIRE (English & Arabic)

# Section 1: Demographic Information | القسم 1: المعلومات الديموغرافية

| Q# | Question (English) السؤال (Arabic) | Response Options | Coding |
| --- | --- | --- | --- |
| 1 | Sex الجنس | Male / Female | 1, 2 |
| 2 | Age (years) العمر (بالسنوات) | ____ years | Continuous |
| 3 | College type نوع الكلية | Medical / Non-medical | 1, 2 |
| 4 | Year of study السنة الدراسية | 1st / 2nd / 3rd / 4th / 5th / 6th | 1-6 |
| 5 | Marital status الحالة الاجتماعية | Single / Married | 1, 2 |
| 6 | Smoking التدخين | Yes / No | 1, 2 |
| 7 | Residence محل السكن | Urban / Rural | 1, 2 |
| 8 | Do you know someone who has/had TB? هل تعرف شخصاً مصاباً أو كان مصاباً بالسل؟ | Yes / No | 1, 2 |
| 9 | Have you heard about TB? هل سمعت عن مرض السل؟ | Yes / No | 1, 2 |
| 10 | Source of information about TB مصدر المعلومات عن السل | Family / Internet / TV / Study / Community / Books / Friend | Text |

# Section 2: Knowledge about Tuberculosis (TB) | القسم 2: المعرفة حول مرض السل

Instructions: Please answer the following questions. Choose "Yes", "No", or "I don't know".

التعليمات: الرجاء الإجابة على الأسئلة التالية. اختر "نعم"، "لا"، أو "لا أعرف".

| Q# | Question (English) السؤال (Arabic) | Correct Answer |
| --- | --- | --- |
| K1 | TB is caused by a bacterium السل سببه بكتيريا | Yes |
| K2 | The organ most affected by TB is the lung العضو الأكثر تأثراً بالسل هو الرئة | Yes |
| K3 | There is a vaccine for TB يوجد لقاح للسل | Yes |
| K4 | TB can be cured يمكن الشفاء من السل | Yes |
| K5 | A person exposed to TB should be tested الشخص المعرض للسل يجب أن يفحص | Yes |
| K6 | The TB microorganism circulates in the air ميكروب السل ينتقل عبر الهواء | Yes |
| K7 | Drug resistance develops if treatment is discontinued مقاومة الأدوية تتطور إذا توقف العلاج | Yes |
| K8 | BCG vaccine provides lifetime protection لقاح BCG يوفر حماية مدى الحياة | No |
| K9 | TB is a contagious disease السل مرض معدي | Yes |
| K10 | BCG vaccine is given at 6 months of age لقاح BCG يعطى في عمر 6 أشهر | No |

Symptoms of TB (select all that apply): | أعراض السل (اختر كل ما يناسب):

- □ Fever / حمى
- □ Constipation / إمساك
- □ Weight loss / فقدان الوزن
- □ Cough with blood / سعال مصحوب بدم
- □ Night sweats / تعرق ليلي
- □ Muscle pain / آلام عضلية
- □ Cough lasting more than 2 weeks / سعال يستمر لأكثر من أسبوعين
- □ I don't know / لا أعرف

Risk factors for TB (select all that apply): | عوامل خطر السل (اختر كل ما يناسب):

- □ Smoking / التدخين
- □ Heart disease / أمراض القلب
- □ Malnutrition / سوء التغذية
- □ Physical inactivity / الخمول البدني
- □ HIV infection / الإصابة بفيروس نقص المناعة
- □ Diabetes mellitus / داء السكري
- □ I don't know / لا أعرف

Transmission routes (select all that apply): | طرق انتقال السل (اختر كل ما يناسب):

- □ Handshakes with TB patients / مصافحة مرضى السل
- □ Air when a TB patient coughs or sneezes / الهواء عندما يسعل أو يعطس مريض السل
- □ Touching contaminated items / لمس الأشياء الملوثة
- □ Sexual transmission / الانتقال الجنسي
- □ Consuming uncooked milk / تناول الحليب غير المبستر
- □ Contaminated blood transfusions / نقل دم ملوث
- □ I don't know / لا أعرف

Treatment and prevention (select all that apply): | العلاج والوقاية (اختر كل ما يناسب):

- □ Most effective treatment is specific medicine / العلاج الفعال هو أدوية محددة
- □ Treatment duration is 6-9 months / مدة العلاج 6-9 أشهر
- □ Wearing a mask prevents transmission / ارتداء الكمامة يمنع الانتقال
- □ Ventilated homes prevent transmission / المنازل جيدة التهوية تمنع الانتقال
- □ I don't know / لا أعرف

# Section 3: Attitude towards Tuberculosis | القسم 3: الاتجاهات نحو السل

Instructions: Please indicate your level of agreement with each statement.

التعليمات: الرجاء تحديد درجة موافقتك على كل عبارة.

| Q# | Statement (English) العبارة (Arabic) | SA (5) | A (4) | N (3) | D (2) | SD (1) |
| --- | --- | --- | --- | --- | --- | --- |
| A1 | If I develop TB, I must immediately notify my family and/or physician إذا أصبت بالسل، يجب أن أخبر عائلتي وطبيبي فوراً | □ | □ | □ | □ | □ |
| A2 | If I had TB, it might NOT decrease my quality of life إذا أصبت بالسل، قد لا ينخفض مستوى جودة حياتي | □ | □ | □ | □ | □ |
| A3 | TB screening is difficult to access at health facilities فحص السل صعب الوصول إليه في المرافق الصحية | □ | □ | □ | □ | □ |
| A4 | TB is regarded as a serious disease يعتبر السل مرضاً خطيراً | □ | □ | □ | □ | □ |
| A5 | Annual medical examinations cannot help prevent TB الفحوصات الطبية السنوية لا تساعد في الوقاية من السل | □ | □ | □ | □ | □ |
| A6 | Education regarding TB is desperately needed التثقيف حول السل ضروري جداً | □ | □ | □ | □ | □ |
| A7 | If I had TB, inability to leave work or lack of knowledge would prevent seeking care إذا أصبت بالسل، عدم القدرة على ترك العمل أو نقص المعرفة سيمنعني من طلب الرعاية | □ | □ | □ | □ | □ |
| A8 | If I had TB, I would take anti-TB medications as prescribed إذا أصبت بالسل، سأتناول أدوية السل كما يصفها الطبيب | □ | □ | □ | □ | □ |

SA = Strongly Agree (5), A = Agree (4), N = Neutral (3), D = Disagree (2), SD = Strongly Disagree (1)

# Section 4: Practice regarding Tuberculosis | القسم 4: الممارسات نحو السل

Instructions: Please indicate how often you perform each behavior.

التعليمات: الرجاء تحديد عدد المرات التي تقوم فيها بكل سلوك.

| Q# | Behavior (English) السلوك (Arabic) | Always (5) | Usually (4) | Sometimes (3) | Rarely (2) | Never (1) |
| --- | --- | --- | --- | --- | --- | --- |
| P1 | I cover my mouth when I sneeze or cough for fear of spreading infections أغطي فمي عندما أعطس أو أسعل خوفاً من نشر العدوى | □ | □ | □ | □ | □ |
| P2 | I open the window to let fresh air enter to avoid infections أفتح النافذة للسماح بدخول الهواء النقي لتجنب العدوى | □ | □ | □ | □ | □ |
| P3 | I eat a well-balanced and nutritious diet to stay healthy أتناول نظاماً غذائياً متوازناً ومغذياً للبقاء بصحة جيدة | □ | □ | □ | □ | □ |
| P4 | I wash my hands or use hand sanitizer after going to the hospital أغسل يدي أو استخدم معقم اليدين بعد الذهاب إلى المستشفى | □ | □ | □ | □ | □ |
| P5 | I wear a facemask when visiting a hospital أرتدي كمامة الوجه عند زيارة المستشفى | □ | □ | □ | □ | □ |
| P6 | I would visit a health facility if my cough persisted for more than two weeks سأزور مرفقاً صحياً إذا استمر سعالى لأكثر من أسبوعين | □ | □ | □ | □ | □ |
| P7 | I read materials intended to raise awareness about TB أقرأ المواد المصممة لزيادة الوعي حول السل | □ | □ | □ | □ | □ |

# Scoring System

| Section | Total Items | Score Range | Good/Positive | Definition |
| --- | --- | --- | --- | --- |
| Knowledge | 22 | 0-22 | Good: ≥16/22 (72.7%) |  |
| Attitude | 8 | 8-40 | Positive: >24/40 (60%) |  |
| Practice | 7 | 7-35 | Good: >21/35 (60%) |  |
