# Supplementary material
Source: Research Square preprint supplement (doi:10.21203/rs.3.rs-10405659/v1)
Supplement: Supplementary file 4 [file acbb25b04f7cf761988c6ce9.docx]

FILE S4: DATA DICTIONARY (CODEBOOK)

Dataset: TB_KAP_Data.csv

Study: Knowledge, Attitude, and Practice Regarding Tuberculosis Among University Students

N = 302 participants

# Section 1: Demographic Variables

| Variable Name | Description | Type | Values/Coding | Missing |
| --- | --- | --- | --- | --- |
| ID | Participant identifier | Nominal | 1-302 | 0 |
| sex | Gender | Binary | 1=Male, 2=Female | 0 |
| age | Age in years | Continuous | 18-35 | 0 |
| college | College type | Binary | 1=Medical, 2=Non-medical | 0 |
| year_study | Year of study | Ordinal | 1=1st, 2=2nd, 3=3rd, 4=4th, 5=5th, 6=6th | 2 |
| marital_status | Marital status | Binary | 1=Single, 2=Married | 1 |
| smoking | Smoking status | Binary | 1=Yes, 2=No | 0 |
| residence | Place of residence | Binary | 1=Urban, 2=Rural | 0 |
| know_TB | Know someone with TB | Binary | 1=Yes, 2=No | 3 |
| heard_TB | Heard about TB | Binary | 1=Yes, 2=No | 0 |
| info_source | Source of TB information | Nominal | Text | 12 |

# Section 2: Knowledge Variables (22 items)

| Variable Name | Description | Coding |
| --- | --- | --- |
| K_cause | TB caused by bacterium | 1=Correct, 0=Incorrect/Unknown |
| K_organ | Lung is primary organ | 1=Correct, 0=Incorrect/Unknown |
| K_vaccine | There is a vaccine (BCG) | 1=Correct, 0=Incorrect/Unknown |
| K_cure | TB can be cured | 1=Correct, 0=Incorrect/Unknown |
| K_test | Exposed person should be tested | 1=Correct, 0=Incorrect/Unknown |
| K_airborne | Microorganism circulates in air | 1=Correct, 0=Incorrect/Unknown |
| K_resistance | Drug resistance from treatment discontinuation | 1=Correct, 0=Incorrect/Unknown |
| K_bcg_lifetime | BCG provides lifetime protection (False) | 1=Correct, 0=Incorrect/Unknown |
| K_contagious | TB is contagious | 1=Correct, 0=Incorrect/Unknown |
| K_bcg_age | BCG at 6 months (False) | 1=Correct, 0=Incorrect/Unknown |
| K_symptom_fever | Fever is a symptom | 1=Selected, 0=Not selected |
| K_symptom_weight_loss | Weight loss is a symptom | 1=Selected, 0=Not selected |
| K_symptom_cough_blood | Cough with blood is a symptom | 1=Selected, 0=Not selected |
| K_symptom_night_sweats | Night sweats is a symptom | 1=Selected, 0=Not selected |
| K_symptom_cough_2weeks | Cough >2 weeks is a symptom | 1=Selected, 0=Not selected |
| K_risk_smoking | Smoking is a risk factor | 1=Selected, 0=Not selected |
| K_risk_malnutrition | Malnutrition is a risk factor | 1=Selected, 0=Not selected |
| K_risk_hiv | HIV is a risk factor | 1=Selected, 0=Not selected |
| K_risk_diabetes | Diabetes is a risk factor | 1=Selected, 0=Not selected |
| K_transmission_air | Airborne transmission | 1=Correct, 0=Incorrect/Unknown |
| K_transmission_handshake | Handshake transmission (False) | 1=Correct, 0=Incorrect/Unknown |
| K_transmission_milk | Uncooked milk transmission (False) | 1=Correct, 0=Incorrect/Unknown |
| K_treatment_specific | Specific medicine is effective | 1=Correct, 0=Incorrect/Unknown |
| K_treatment_duration | 6-9 months duration | 1=Correct, 0=Incorrect/Unknown |
| K_prevention_mask | Wearing mask prevents transmission | 1=Selected, 0=Not selected |
| K_prevention_ventilation | Ventilated homes prevent transmission | 1=Selected, 0=Not selected |

Knowledge Total Score: K_total = sum of all 22 items (range 0-22)

# Section 3: Attitude Variables (8 items)

| Variable Name | Description | Coding (1-5 Likert) |
| --- | --- | --- |
| A1 | Would notify family/physician | 1=Strongly Disagree to 5=Strongly Agree |
| A2 | TB would NOT decrease quality of life (reverse coded) | 1=Strongly Disagree to 5=Strongly Agree |
| A3 | TB screening difficult to access | 1=Strongly Disagree to 5=Strongly Agree |
| A4 | TB is a serious disease | 1=Strongly Disagree to 5=Strongly Agree |
| A5 | Annual exams cannot prevent TB | 1=Strongly Disagree to 5=Strongly Agree |
| A6 | TB education is needed | 1=Strongly Disagree to 5=Strongly Agree |
| A7 | Work/knowledge barriers prevent care-seeking | 1=Strongly Disagree to 5=Strongly Agree |
| A8 | Would take medications as prescribed | 1=Strongly Disagree to 5=Strongly Agree |

Attitude Total Score: A_total = sum of A1 to A8 (range 8-40)

# Section 4: Practice Variables (7 items)

| Variable Name | Description | Coding (1-5 Frequency) |
| --- | --- | --- |
| P1 | Cover mouth when coughing/sneezing | 1=Never to 5=Always |
| P2 | Open windows for fresh air | 1=Never to 5=Always |
| P3 | Eat balanced diet | 1=Never to 5=Always |
| P4 | Wash hands after hospital visit | 1=Never to 5=Always |
| P5 | Wear facemask at hospital | 1=Never to 5=Always |
| P6 | Seek care if cough >2 weeks | 1=Never to 5=Always |
| P7 | Read TB awareness materials | 1=Never to 5=Always |

Practice Total Score: P_total = sum of P1 to P7 (range 7-35)

# Derived Variables

| Variable Name | Description | Formula |
| --- | --- | --- |
| K_category | Knowledge category | 0=Poor (0-10), 1=Moderate (11-15), 2=Good (16-22) |
| poor_knowledge | Poor knowledge (binary) | 1 if K_total ≤10, else 0 |
| good_knowledge_60 | Good knowledge at 60% cutoff | 1 if K_total ≥13, else 0 |
| good_knowledge_70 | Good knowledge at 70% cutoff | 1 if K_total ≥15, else 0 |
| good_knowledge_80 | Good knowledge at 80% cutoff | 1 if K_total ≥18, else 0 |
| positive_attitude | Positive attitude | 1 if A_total >24, else 0 |
| good_practice | Good practice | 1 if P_total >21, else 0 |
