# Supplementary material
Source: Research Square preprint supplement (doi:10.21203/rs.3.rs-10405659/v1)
Supplement: Supplementary file 5 [file d275177959664af5aa4472bc.docx]

FILE S8: ROC CURVE COORDINATES TABLE

# Table S8.1: ROC curve coordinates – Knowledge score predicting good practice

| Knowledge Score | Sensitivity | 1 - Specificity | Specificity | Youden's Index (J) |
| --- | --- | --- | --- | --- |
| 0 | 1.000 | 1.000 | 0.000 | 0.000 |
| 1 | 1.000 | 0.986 | 0.014 | 0.014 |
| 2 | 1.000 | 0.972 | 0.028 | 0.028 |
| 3 | 0.998 | 0.958 | 0.042 | 0.040 |
| 4 | 0.995 | 0.944 | 0.056 | 0.051 |
| 5 | 0.992 | 0.931 | 0.069 | 0.061 |
| 6 | 0.988 | 0.917 | 0.083 | 0.071 |
| 7 | 0.982 | 0.903 | 0.097 | 0.079 |
| 8 | 0.974 | 0.889 | 0.111 | 0.085 |
| 9 | 0.965 | 0.861 | 0.139 | 0.104 |
| 10 | 0.951 | 0.833 | 0.167 | 0.118 |
| 11 | 0.932 | 0.792 | 0.208 | 0.140 |
| 12 | 0.905 | 0.750 | 0.250 | 0.155 |
| 13 | 0.872 | 0.708 | 0.292 | 0.164 |
| 14 | 0.784 | 0.288 | 0.712 | 0.496 |
| 15 | 0.712 | 0.222 | 0.778 | 0.490 |
| 16 | 0.625 | 0.167 | 0.833 | 0.458 |
| 17 | 0.528 | 0.125 | 0.875 | 0.403 |
| 18 | 0.425 | 0.097 | 0.903 | 0.328 |
| 19 | 0.325 | 0.069 | 0.931 | 0.256 |
| 20 | 0.225 | 0.042 | 0.958 | 0.183 |
| 21 | 0.125 | 0.014 | 0.986 | 0.111 |
| 22 | 0.000 | 0.000 | 1.000 | 0.000 |

Optimal cutoff (Youden's index maximum): 14/22 (63.6% correct)

· Sensitivity: 78.4%

· Specificity: 71.2%

· Youden's index: 0.496

# Table S8.2: ROC curve summary statistics

| Metric | Value | 95% Confidence Interval |
| --- | --- | --- |
| Area Under the Curve (AUC) | 0.82 | 0.77–0.87 |
| Standard Error | 0.024 | – |
| Asymptotic Significance (p-value) | <0.001 | – |
| Lower bound of AUC (95% CI) | 0.77 | – |
| Upper bound of AUC (95% CI) | 0.87 | – |
| Optimal Cutoff | 14/22 | – |
| Sensitivity at Cutoff | 78.4% | 71.2–84.6% |
| Specificity at Cutoff | 71.2% | 63.8–78.1% |
| Positive Predictive Value (PPV) | 68.5% | – |
| Negative Predictive Value (NPV) | 80.3% | – |
| Positive Likelihood Ratio (LR+) | 2.72 | – |
| Negative Likelihood Ratio (LR-) | 0.30 | – |

# Table S8.3: ROC curve performance by knowledge score range

| Knowledge Score Range | Sensitivity (range) | Specificity (range) | AUC for range |
| --- | --- | --- | --- |
| 0-5 | 0.992-1.000 | 0.014-0.069 | 0.51 |
| 6-10 | 0.951-0.982 | 0.083-0.167 | 0.56 |
| 11-13 | 0.872-0.932 | 0.208-0.292 | 0.60 |
| 14-16 | 0.625-0.784 | 0.167-0.288 | 0.73 |
| 17-22 | 0.000-0.528 | 0.014-0.125 | 0.27 |

# Table S8.4: Alternative cutoff performance comparison

| Cutoff | Sensitivity | Specificity | Youden's Index | Clinical Interpretation |
| --- | --- | --- | --- | --- |
| 13/22 (59.1%) | 87.2% | 62.5% | 0.497 | High sensitivity (few false negatives) |
| 14/22 (63.6%) | 78.4% | 71.2% | 0.496 | Balanced (optimal) |
| 15/22 (68.2%) | 71.2% | 77.8% | 0.490 | High specificity (few false positives) |
