# Supplementary material
Source: Research Square preprint supplement (doi:10.21203/rs.3.rs-10405659/v1)
Supplement: Supplementary file 6 [file d4c3de38cbfa8aeb9d6b06fb.docx]

File S5: SPSS Syntax Analysis

File: TB_KAP_Analysis.sps

Purpose: Complete analysis for TB-KAP study among university students

Data: TB_KAP_Data.csv (N=302)

--------------------------------------------------

*FILE: TB_KAP_Analysis.sps*

*PURPOSE: Complete analysis for TB-KAP study among university students*

*DATA: TB_KAP_Data.csv (N=302)*

# 1. IMPORT DATA

GET DATA

/TYPE=TXT

/FILE="C:\YourPath\TB_KAP_Data.csv"

/DELCASE=LINE

/DELIMITERS=","

/QUALIFIER='"'

/ARRANGEMENT=DELIMITED

/FIRSTCASE=2

/DATATYPEMIN PERCENTAGE=95

/VARIABLES=

ID F5.0

sex F5.0

age F5.0

college F5.0

year_study F5.0

marital_status F5.0

smoking F5.0

residence F5.0

know_TB F5.0

heard_TB F5.0

K_cause F5.0

K_organ F5.0

K_vaccine F5.0

K_cure F5.0

K_test F5.0

K_airborne F5.0

K_resistance F5.0

K_bcg_lifetime F5.0

K_contagious F5.0

K_bcg_age F5.0

K_symptom_fever F5.0

K_symptom_weight_loss F5.0

K_symptom_cough_blood F5.0

K_symptom_night_sweats F5.0

K_symptom_cough_2weeks F5.0

K_risk_smoking F5.0

K_risk_malnutrition F5.0

K_risk_hiv F5.0

K_risk_diabetes F5.0

K_transmission_air F5.0

K_transmission_handshake F5.0

K_transmission_milk F5.0

K_treatment_specific F5.0

K_treatment_duration F5.0

K_prevention_mask F5.0

K_prevention_ventilation F5.0

A1 F5.0

A2 F5.0

A3 F5.0

A4 F5.0

A5 F5.0

A6 F5.0

A7 F5.0

A8 F5.0

P1 F5.0

P2 F5.0

P3 F5.0

P4 F5.0

P5 F5.0

P6 F5.0

P7 F5.0.

CACHE.

EXECUTE.

# 2. COMPUTE TOTAL SCORES

COMPUTE K_total = SUM(K_cause, K_organ, K_vaccine, K_cure, K_test,

K_airborne, K_resistance, K_bcg_lifetime, K_contagious,

K_bcg_age, K_symptom_fever, K_symptom_weight_loss,

K_symptom_cough_blood, K_symptom_night_sweats,

K_symptom_cough_2weeks, K_risk_smoking, K_risk_malnutrition,

K_risk_hiv, K_risk_diabetes, K_transmission_air,

K_transmission_handshake, K_transmission_milk,

K_treatment_specific, K_treatment_duration,

K_prevention_mask, K_prevention_ventilation).

EXECUTE.

COMPUTE A_total = SUM(A1, A2, A3, A4, A5, A6, A7, A8).

EXECUTE.

COMPUTE P_total = SUM(P1, P2, P3, P4, P5, P6, P7).

EXECUTE.

# 3. RECODE CATEGORICAL VARIABLES

*Knowledge categories*

RECODE K_total (0 thru 10 = 0) (11 thru 15 = 1) (16 thru 22 = 2) INTO K_category.

VALUE LABELS K_category 0 'Poor' 1 'Moderate' 2 'Good'.

*Poor knowledge (binary)*

RECODE K_total (0 thru 10 = 1) (11 thru 22 = 0) INTO poor_knowledge.

VALUE LABELS poor_knowledge 0 'Not poor' 1 'Poor'.

*Alternative cutoffs for sensitivity analysis*

RECODE K_total (0 thru 12 = 0) (13 thru 22 = 1) INTO good_knowledge_60.

RECODE K_total (0 thru 14 = 0) (15 thru 22 = 1) INTO good_knowledge_70.

RECODE K_total (0 thru 17 = 0) (18 thru 22 = 1) INTO good_knowledge_80.

*Positive attitude*

RECODE A_total (8 thru 24 = 0) (25 thru 40 = 1) INTO positive_attitude.

VALUE LABELS positive_attitude 0 'Negative' 1 'Positive'.

*Good practice*

RECODE P_total (7 thru 21 = 0) (22 thru 35 = 1) INTO good_practice.

VALUE LABELS good_practice 0 'Poor' 1 'Good'.

# 4. DESCRIPTIVE STATISTICS

FREQUENCIES VARIABLES = sex college year_study marital_status smoking residence know_TB

/ORDER=ANALYSIS.

DESCRIPTIVES VARIABLES = age K_total A_total P_total

/STATISTICS = MEAN STDDEV MIN MAX.

# 5. RELIABILITY ANALYSIS (Cronbach's Alpha)

*Knowledge reliability*

RELIABILITY

/VARIABLES = K_cause K_organ K_vaccine K_cure K_test K_airborne K_resistance

K_bcg_lifetime K_contagious K_bcg_age K_symptom_fever K_symptom_weight_loss

K_symptom_cough_blood K_symptom_night_sweats K_symptom_cough_2weeks

K_risk_smoking K_risk_malnutrition K_risk_hiv K_risk_diabetes

K_transmission_air K_transmission_handshake K_transmission_milk

K_treatment_specific K_treatment_duration K_prevention_mask K_prevention_ventilation

/SCALE(Knowledge) ALL

/MODEL=ALPHA

/STATISTICS=DESCRIPTIVE SCALE CORR.

*Attitude reliability*

RELIABILITY

/VARIABLES = A1 A2 A3 A4 A5 A6 A7 A8

/SCALE(Attitude) ALL

/MODEL=ALPHA.

*Practice reliability*

RELIABILITY

/VARIABLES = P1 P2 P3 P4 P5 P6 P7

/SCALE(Practice) ALL

/MODEL=ALPHA.

# 6. BIVARIABLE ANALYSIS (Chi-square tests)

CROSSTABS

/TABLES = sex college year_study know_TB smoking residence marital_status BY K_category

/FORMAT=AVALUE TABLES

/STATISTICS=CHISQ

/CELLS=COUNT ROW

/COUNT ROUND CELL.

# 7. BINARY LOGISTIC REGRESSION

LOGISTIC REGRESSION VARIABLES poor_knowledge

/METHOD=ENTER sex college year_study know_TB smoking

/CONTRAST (sex)=Indicator(1)

/CONTRAST (college)=Indicator(1)

/PRINT=GOODFIT CI(95)

/CRITERIA=PIN(0.05) POUT(0.10) ITERATE(20) CUT(0.5).

# 8. SENSITIVITY ANALYSIS

# 60% cutoff

LOGISTIC REGRESSION VARIABLES good_knowledge_60

/METHOD=ENTER sex college year_study know_TB smoking.

# 70% cutoff

LOGISTIC REGRESSION VARIABLES good_knowledge_70

/METHOD=ENTER sex college year_study know_TB smoking.

# 80% cutoff

LOGISTIC REGRESSION VARIABLES good_knowledge_80

/METHOD=ENTER sex college year_study know_TB smoking.

# 9. ROC CURVE ANALYSIS

ROC CURVES

/TESTPOS = P_total (للممارسة الجيدة)

/DISTRIBUTION = FREE

/CRITERIA = CUTOFF(INCLUDE) TESTPOS(1)

/PLOT = CURVE(REFERENCE)

/PRINT = SE COORDINATES.

# 10. HIERARCHICAL REGRESSION

REGRESSION

/DESCRIPTIVES MEAN STDDEV CORR SIG N

/MISSING LISTWISE

/STATISTICS COEFF OUTS R ANOVA CHANGE

/DEPENDENT P_total

/METHOD=ENTER age sex college year_study

/METHOD=ENTER K_total

/METHOD=ENTER A_total.

# 11. CORRELATION ANALYSIS

CORRELATIONS

/VARIABLES = K_total A_total P_total

/PRINT=TWOTAIL NOSIG

/STATISTICS DESCRIPTIVES.

# 12. CLUSTER ANALYSIS (K-means)

*Standardize variables*

DESCRIPTIVES VARIABLES = K_total A_total P_total

/SAVE Z.

QUICK CLUSTER ZK_total ZA_total ZP_total

/MISSING=LISTWISE

/CRITERIA=CLUSTER(3) MXITER(10) CONVERGE(0)

/METHOD=KMEANS(NOUPDATE)

/SAVE CLUSTER(ClusterID).

# 13. ANOVA FOR CLUSTER VALIDATION

ONEWAY K_total A_total P_total BY ClusterID

/STATISTICS DESCRIPTIVES

/MISSING ANALYSIS.

# 14. EXPORT CLEANED DATA

SAVE OUTFILE="C:\YourPath\TB_KAP_Analyzed.sav"

/COMPRESSED.
